# Supplementary material for: Additive Effects of Solid Paraffins on Mechanical Properties of High-Density Polyethylene
Source: MDPI journal article supplement (doi:10.3390/polym15051320), 2023-03-06
Supplement: s1 [file s1]

Figure S1 shows the temperature dependences of the storage modulus  $E'$ , loss modulus  $E''$  and loss tangent  $\tan \delta$  measured at 10Hz and a heating rate of 2 °C/min for HDPE/nPW and HDPE/iPW with PW contents of 10w% and 5w%.

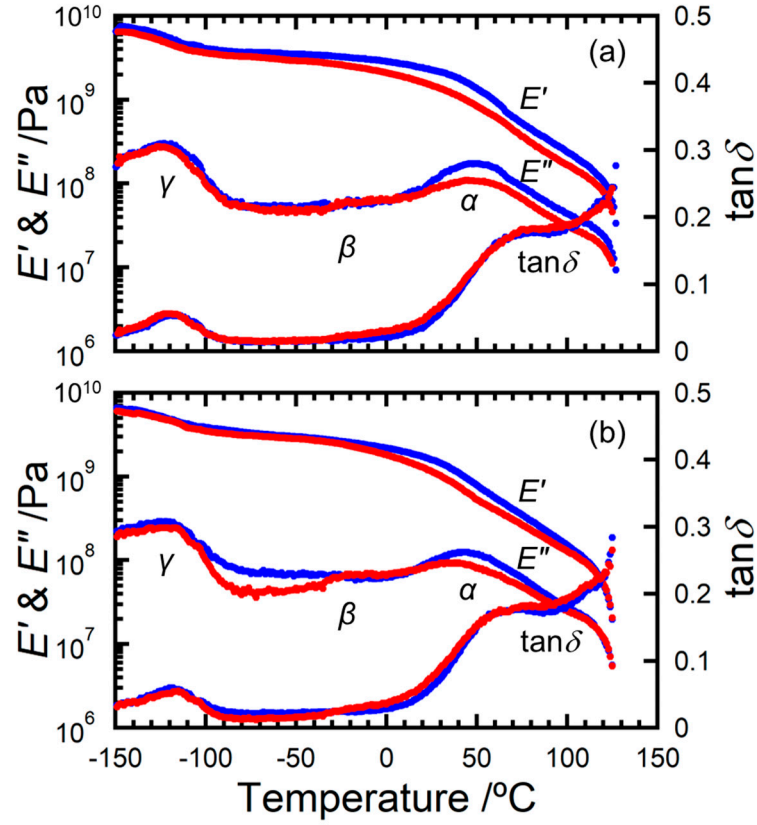

**Figure S1.** Dynamic viscoelastic spectra of (a) HDPE/nPW (95w/5w) (blue) and HDPE/iPW (95w/5w) (red) and (b) HDPE/nPW (90w/10w) (blue) and HDPE/iPW (90w/10w) (red).

Figure S2 shows the stress-strain curves measured at an elongation speed of 10 mm/min for HDPE/iPW blends. The stress values were normalized by the content of HDPE.

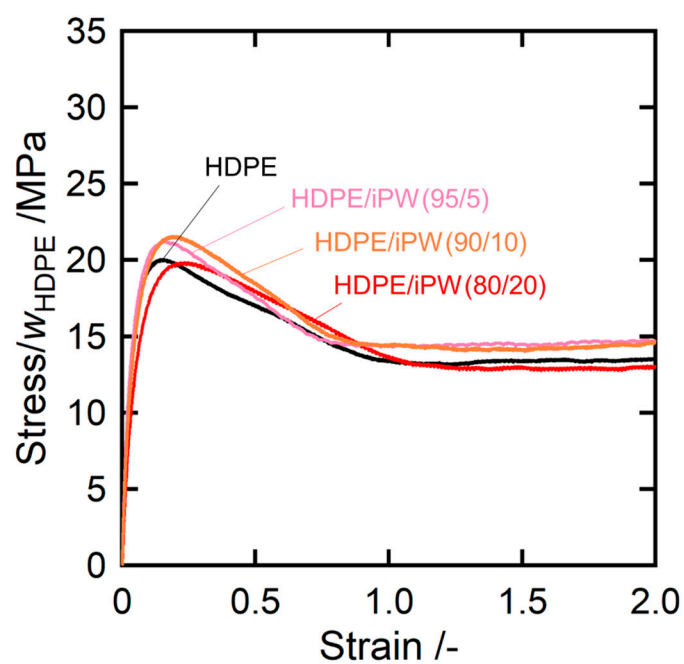

**Figure S2.** Stress–strain curves of initial HDPE and HDPE/iPW. The stress values are divided by the weight fraction of HDPE.
